# Supplementary material for: Identification and Construction of Strong Promoters in Yarrowia lipolytica Suitable for Glycerol-Based Bioprocesses
Source: MDPI journal article supplement (doi:10.3390/microorganisms11051152), 2023-04-28
Supplement: s1 [file s1]

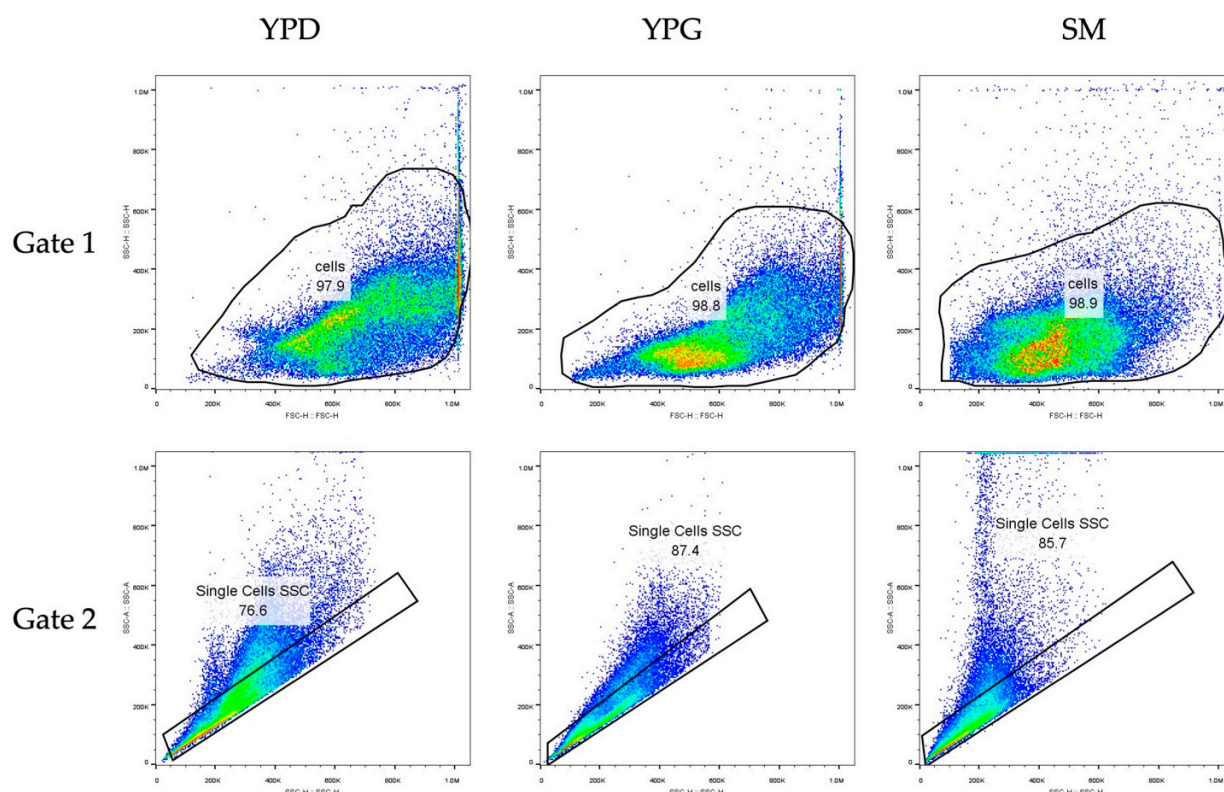

**Figure S1.** Example of the gating strategy used for the analysis of the flow cytometry data. The gates were implemented in the above order (Gate 1, Gate 2) in every sample. Gate 1 was implemented to exclude any debris in the sample, while Gate 2 was implemented to select only single cells and exclude any aggregates. The above subfigures depict the gates for one wild-type (WT 28849) biological replicate at 24 hours of culture in the three growth media.

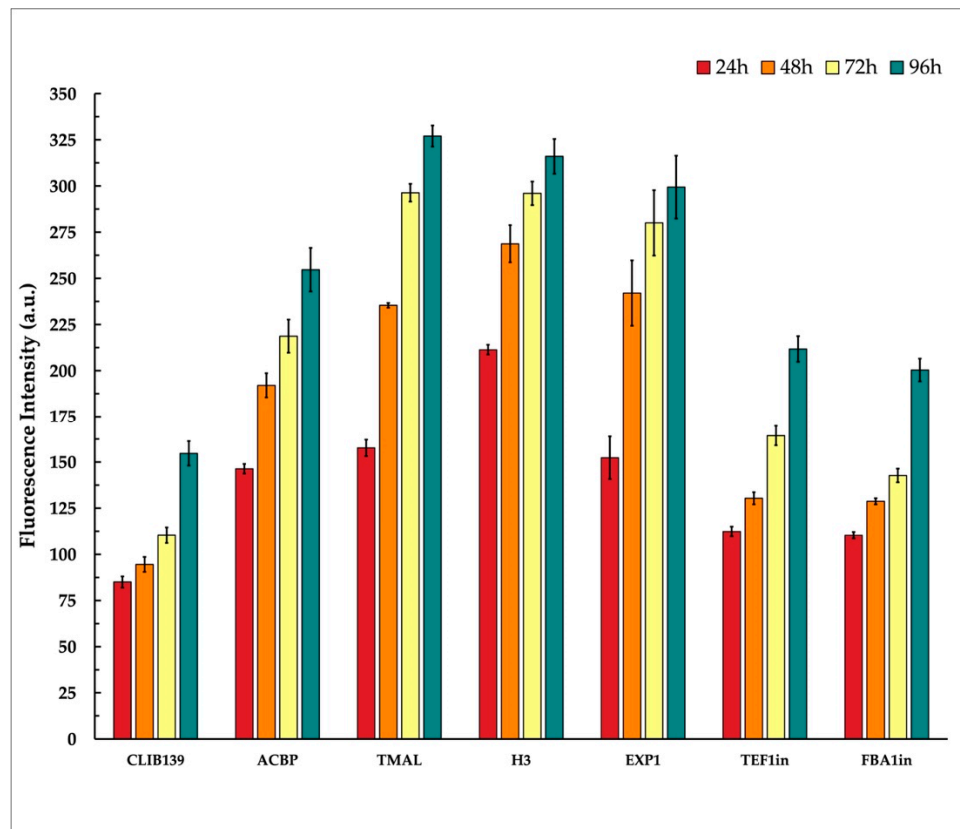

**Figure S2.** Promoter activity of the endogenous promoters in the *Y. lipolytica* strain Pold (CLIB139), as determined using flow cytometry and presented as fluorescence intensity of the reporter mCherry protein after cultivation in the YPG medium for 96 hours. These data were generated using the BL3-H (695/40) filter on the Attune NxT Acoustic Focusing Cytometer.

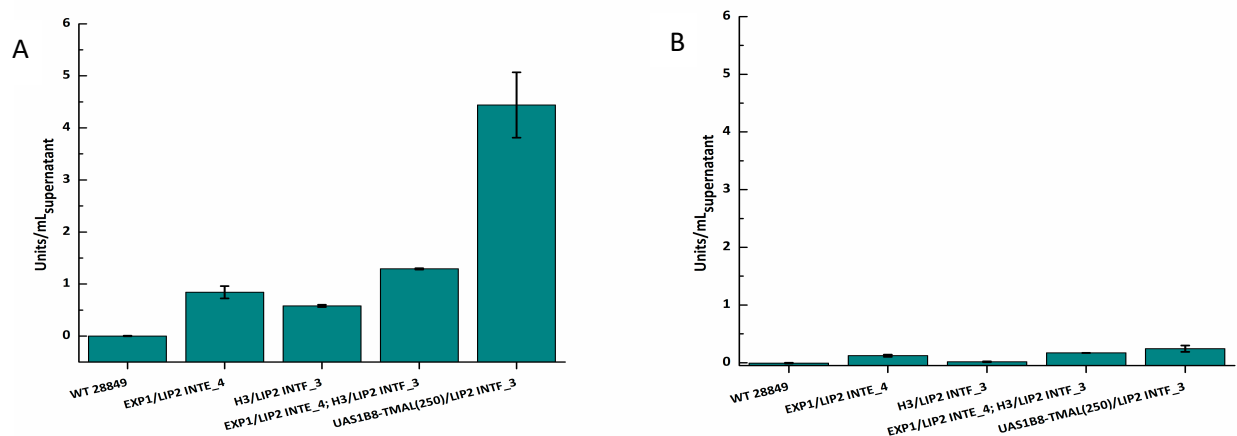

**Figure S3.** Effect of promoter type and *LIP2* copy number on the enzymatic activity (Units/mL<sub>supernatant</sub>) of the recombinant *Yarrowia* strains bearing the newly constructed integrated *LIP2* expression cassettes and grown in A) YPG and B) synthetic media. Hydrolytic activity was photometrically (410nm) determined using the pNPB assay as described in Materials and Methods and expressed as the amount of enzymatic preparation (*LIP2* secreted in 1 mL culture medium) that generates 1  $\mu$ mol pNP per minute at 30°C (1 Unit).

**Table S1. List of plasmids**

| Plasmid                                          | Relevant Characteristics                                                                        | Source           |
|--------------------------------------------------|-------------------------------------------------------------------------------------------------|------------------|
| <b>Parental replicative vectors</b>              |                                                                                                 |                  |
| pBlueScript SK-                                  | AmpR, f1 ori, pUC ori                                                                           |                  |
| pBlue-ARS18                                      | AmpR, f1 ori, pUC ori, ARS18                                                                    | This study       |
| pBlue-ARS18-prEXP1-HYG                           | AmpR, f1 ori, pUC ori, ARS18, loxP, prEXP1-HphSyn-TTef, loxP                                    | This study       |
| pBlue-ARS18-prTEF1in-NAT                         | AmpR, f1 ori, pUC ori, ARS18, loxP, prTEF1intron-NAT-Tcyc1, loxP                                | This study       |
| <b>Basic episomal vectors for promoter study</b> |                                                                                                 |                  |
| pHYLTEF1in                                       | AmpR, f1 ori, pUC ori, ARS18, prTEF1intron, TSynth2, loxP, prEXP1-HphSyn-TTef, loxP             | This study       |
| pHYLEXP1                                         | AmpR, f1 ori, pUC ori, ARS18, prEXP1, TSynth2, loxP, prEXP1-HphSyn-TTef, loxP                   | This study       |
| pNYLEXP1                                         | AmpR, f1 ori, pUC ori, ARS18, prEXP1, TSynth2, loxP, prTEF1intron-NAT-Tcyc1, loxP               | This study       |
| pNYLH3                                           | AmpR, f1 ori, pUC ori, ARS18, prH3, TSynth2, loxP, prTEF1intron-NAT-Tcyc1, loxP                 | This study       |
| pNYLACBP                                         | AmpR, f1 ori, pUC ori, ARS18, prACBP, TSynth2, loxP, prTEF1intron-NAT-Tcyc1, loxP               | This study       |
| pNYLTMALtrim                                     | AmpR, f1 ori, pUC ori, ARS18, prTMALtrim, TSynth2, loxP, prTEF1intron-NAT-Tcyc1, loxP           | This study       |
| pNYLFBA1in                                       | AmpR, f1 ori, pUC ori, ARS18, prFBA1intron, TSynth2, loxP, prTEF1intron-NAT-Tcyc1, loxP         | This study       |
| pCRISPRyl                                        | prUAS1B8-TEF(136)                                                                               | Ian Wheeldon [1] |
| pBlueUAS1B8-TEF(136)                             | AmpR, f1 ori, pUC ori, prUAS1B8-TEF(136)                                                        | This study       |
| pBlueUAS1B8-H3(260)                              | AmpR, f1 ori, pUC ori, prUAS1B8-H3p(260)                                                        | This study       |
| pBlueUAS1B8-TMAL(250)                            | AmpR, f1 ori, pUC ori, prUAS1B8-TMALp(250)                                                      | This study       |
| pNYLUAS1B8-TEF(136)                              | AmpR, f1 ori, pUC ori, ARS18, prUAS1B8-TEF(136), TSynth2, loxP, prTEF1intron-NAT-Tcyc1, loxP    | This study       |
| pNYLUAS1B8-H3(260)                               | AmpR, f1 ori, pUC ori, ARS18, prUAS1B8-H3(260), TSynth2, loxP, prTEF1intron-NAT-Tcyc1, loxP     | This study       |
| pNYLUAS1B8-TMAL(250)                             | AmpR, f1 ori, pUC ori, ARS18, prUAS1B8-TMAL(250), TSynth2, loxP, prTEF1intron-NAT-Tcyc1, loxP   | This study       |
| <b>Episomal vectors with <i>mCherry</i> gene</b> |                                                                                                 |                  |
| pNYLEXP1/mCherry                                 | AmpR, f1 ori, pUC ori, ARS18, prEXP1-mCherry*-TSynth2, loxP, prTEF1intron-NAT-Tcyc1, loxP       | This study       |
| pNYLH3/mCherry                                   | AmpR, f1 ori, pUC ori, ARS18, prH3-mCherry*-TSynth2, loxP, prTEF1intron-NAT-Tcyc1, loxP         | This study       |
| pNYLACBP/mCherry                                 | AmpR, f1 ori, pUC ori, ARS18, prACBP-mCherry*-TSynth2, loxP, prTEF1intron-NAT-Tcyc1, loxP       | This study       |
| pNYLTMALtrim/mCherry                             | AmpR, f1 ori, pUC ori, ARS18, prTMALtrim-mCherry*-TSynth2, loxP, prTEF1intron-NAT-Tcyc1, loxP   | This study       |
| pNYLFBA1in/mCherry                               | AmpR, f1 ori, pUC ori, ARS18, prFBA1intron-mCherry*-TSynth2, loxP, prTEF1intron-NAT-Tcyc1, loxP | This study       |
| pHYLTEF1in/mCherry                               | AmpR, f1 ori, pUC ori, ARS18, prTEF1intron-mCherry*-TSynth2, loxP, prEXP1-HphSyn-TTef, loxP     | This study       |

|                                                     |                                                                                                                    |                    |
|-----------------------------------------------------|--------------------------------------------------------------------------------------------------------------------|--------------------|
| pNYLUAS1B8-TEF(136)/mCherry                         | AmpR, f1 ori, pUC ori, ARS18, prUAS1B8-TEF(136)-mCherry*-TSynth2, loxP, prTEF1intron-NAT-Tcyc1, loxP               | This study         |
| pNYLUAS1B8-H3p(260)/mCherry                         | AmpR, f1 ori, pUC ori, ARS18, prUAS1B8-H3p(260)-mCherry*-TSynth2, loxP, prTEF1intron-NAT-Tcyc1, loxP               | This study         |
| pNYLUAS1B8-TMALp(250)/mCherry                       | AmpR, f1 ori, pUC ori, ARS18, prUAS1B8-TMALp(250)-mCherry*-TSynth2, loxP, prTEF1intron-NAT-Tcyc1, loxP             | This study         |
| <b>Basic EasyCloneYALI integrative vectors used</b> |                                                                                                                    |                    |
| pCfB4785                                            | AmpR, pUC ori, INTF_3 UP, TPex20, TLip2, loxP, prTEF1intron-NAT-Tcyc1, loxP, INTF_3 DW                             | Irina Borodina [2] |
| pCfB4787                                            | AmpR, pUC ori, INTE_4 UP, TPex20, TLip2, loxP, prTEF1intron-NAT-Tcyc1, loxP, INTE_4 DW                             | Irina Borodina [2] |
| pCfB6576                                            | AmpR, pUC ori, INTE_3 UP, TPex20, TLip2, loxP, prEXP1-HphSyn-TTef, loxP, INTE_3 DW                                 | Irina Borodina [2] |
| <b>Basic integrative vectors for promoter study</b> |                                                                                                                    |                    |
| pYLH3 INTF_3                                        | AmpR, pUC ori, INTF_3 UP, TPex20, prH3, TLip2, loxP, prTEF1intron-NAT-Tcyc1, loxP, INTF_3 DW                       | This study         |
| pYLTMALtrim INTF_3                                  | AmpR, pUC ori, INTF_3 UP, TPex20, prTMALtrim, TLip2, loxP, prTEF1intron-NAT-Tcyc1, loxP, INTF_3 DW                 | This study         |
| pYLEXP1 INTF_3                                      | AmpR, pUC ori, INTF_3 UP, TPex20, prEXP1, TLip2, loxP, prTEF1intron-NAT-Tcyc1, loxP, INTF_3 DW                     | This study         |
| pYLUAS1B8-TEF(136) INTF_3                           | AmpR, pUC ori, INTF_3 UP, TPex20, prUAS1B8-TEF(136), TLip2, loxP, prTEF1intron-NAT-Tcyc1, loxP, INTF_3 DW          | This study         |
| pYLUAS1B8-H3(260) INTF_3                            | AmpR, pUC ori, INTF_3 UP, TPex20, prUAS1B8-H3(260), TLip2, loxP, prTEF1intron-NAT-Tcyc1, loxP, INTF_3 DW           | This study         |
| pYLUAS1B8-TMAL(250) INTF_3                          | AmpR, pUC ori, INTF_3 UP, TPex20, prUAS1B8-TMAL(250), TLip2, loxP, prTEF1intron-NAT-Tcyc1, loxP, INTF_3 DW         | This study         |
| <b>Integrative vectors with mCherry gene</b>        |                                                                                                                    |                    |
| pYLH3/mCherry INTF_3                                | AmpR, pUC ori, INTF_3 UP, TPex20, prH3-mCherry*-TLip2, loxP, prTEF1intron-NAT-Tcyc1, loxP, INTF_3 DW               | This study         |
| pYLTMALtrim/mCherry INTF_3                          | AmpR, pUC ori, INTF_3 UP, TPex20, prTMAL-mCherry*-TLip2, loxP, prTEF1intron-NAT-Tcyc1, loxP, INTF_3 DW             | This study         |
| pYLEXP1/mCherry INTF_3                              | AmpR, pUC ori, INTF_3 UP, TPex20, prEXP1-mCherry*-TLip2, loxP, prTEF1intron-NAT-Tcyc1, loxP, INTF_3 DW             | This study         |
| pYLUAS1B8-TEF(136)/mCherry INTF_3                   | AmpR, pUC ori, INTF_3 UP, TPex20, prUAS1B8-TEF(136)-mCherry*-TLip2, loxP, prTEF1intron-NAT-Tcyc1, loxP, INTF_3 DW  | This study         |
| pYLUAS1B8-H3(260)/mCherry INTF_3                    | AmpR, pUC ori, INTF_3 UP, TPex20, prUAS1B8-H3(260)-mCherry*-TLip2, loxP, prTEF1intron-NAT-Tcyc1, loxP, INTF_3 DW   | This study         |
| pYLUAS1B8-TMALp(250)/mCherry INTF_3                 | AmpR, pUC ori, INTF_3 UP, TPex20, prUAS1B8-TMAL(250)-mCherry*-TLip2, loxP, prTEF1intron-NAT-Tcyc1, loxP, INTF_3 DW | This study         |
| <b>Integrative vectors with LIP2 gene</b>           |                                                                                                                    |                    |
| pYLH3/LIP2-INTF_3                                   | AmpR, pUC ori, INTF_3 UP, TPex20, prH3-LIP2-TLip2, loxP, prTEF1intron-NAT-Tcyc1, loxP, INTF_3 DW                   | This study         |
| pYLUAS1B8-H3p(260)/LIP2_INTF_3                      | AmpR, pUC ori, INTF_3 UP, TPex20, prUAS1B8-H3p(260)-LIP2-TLip2, loxP, prTEF1intron-NAT-Tcyc1, loxP, INTF_3 DW      | This study         |

**Table S2. List of primers used in cloning and qPCR.**

| Primer | Name                 | Sequence                                                                        | Used for                               |
|--------|----------------------|---------------------------------------------------------------------------------|----------------------------------------|
| F1     | 5'-ARS18             | ggatcccaatattacaccaagtag                                                        | pCRII-TOPO/YLARS18                     |
| R1     | 3'-ARS18             | gatccagctctacactgattaattttc                                                     |                                        |
| F2     | GBN-ARS18-F          | agctccaccgcggtggcggccgatcccaatattacacc                                          | pBlueARS18                             |
| R2     | GBN-ARS18-R          | cagcccgggggatccactagtagtccagctctacactgatt                                       |                                        |
| F3     | GBN-pH-TEF1in-F      | tcgaaggcctatgcggccaactagtagagaccgggttgccgg                                      | pBlueARS18-prTEF1in-NAT, pH-TEF1in-Ts2 |
| R3     | GBN-Ts2-R            | atatatatatatatatatactcgagctcgaggtcgacgagc<br>tcgaatt                            |                                        |
| F4     | GBN-PrEXP1-F         | atcgataccgtcgacctcgagaaggagttggcgcccgtttttt<br>c                                | pBlueARS18-prEXP1-HYG                  |
| R4     | GBN-TTEF-R           | cactatagggcgaattgggtacaattcggacacgggcatctc                                      |                                        |
| F5     | GBN-pCFB-TEF1in-F    | acttcaacggaatgcgtgcgagagaccgggttgccggcgca                                       | pYLTEF1in INTE_4                       |
| R5     | GBN-pCFB-TEF1in-R    | gaacagaaggaatgcacgcgctcgaggtcgacgagctcgaa<br>ttcggatccccctgcgggttagtactgcaaaaag |                                        |
| F6     | GBN-pH-EXP1-SmaI-F   | gaaggcctatgcggccaactagtcggggaaggagttggcg<br>cccgt                               | pH-EXP1-Ts2                            |
| R6     | GBN-mcs-EXP1         | gacgagctcgaaatcggatcctgctgtagatatgtcttg                                         |                                        |
| F7     | GBN-TEF1in-F         | aatcagtgtagactggatactagtgaggcctatgcggccaa<br>c                                  | pHTEF1in                               |
| R7     | GBN-Ts2-R-YL         | aacgggcgccaaactcctttcctttgaaagatgatactct                                        |                                        |
| F8     | GBN-ARS-EXP1-SmaI    | agtgtagactggatactagtcggggaaggagttggc                                            | pNYLEXP1                               |
| R8     | GBN-Ts2-Tef1-R       | atgcgcgccaaccgggtctctagctctttgaaagatgatact<br>ctt                               |                                        |
| F9     | FBA1p-F              | tgagtgcgtacgtagcaacaacag                                                        | pCRII-TOPO/YLFBA1in                    |
| R9     | FBA1-E2-R            | tgtgctctcggcggtactcgaagag                                                       |                                        |
| F10    | GBN-ARS18-FBA1in-F   | actggatactagtcggggcccttgagtgcgtacgtagcaac<br>aacag                              | pNYLFBA1in                             |
| R10    | GBN-pNYL-FBA1-E2-R   | acgagctcgaattcggatccttggtgctctcgggctactcgaa<br>gag                              |                                        |
| F11    | YL_H3prom-F          | gtgcgcgagctgtctatgagctctct                                                      | pCRII-TOPO/YLH3                        |
| R11    | YL_H3prom-R          | tgtattgtttgttgagtggttgagt                                                       |                                        |
| F12    | GBN-pNYL-H3p-F       | agactggatactagtcgggggtgcgcgagctgtctatg                                          | pNYLH3                                 |
| R12    | GBN-pNYL-H3p-R       | gtcgacgagctcgaattcggatcctgtattgtttgttgagtg                                      |                                        |
| F13    | YL-ACBPprom-F        | accggctctaagtataccaacga                                                         | pCRII-TOPO/YLACBP, pCRII-TOPO/ACBP(n)  |
| R13    | YL-ACBPprom-R        | gggtgtaattgtgggtgtgtgtggag                                                      | pCRII-TOPO/YLACBP                      |
| F14    | YALIO C06237prom-F   | cgctaagtagtacaagctacaagcac                                                      | pCRII-TOPO/YLTMAL                      |
| R14    | YALIO C06237prom-R   | ggttgagtagtggtggtgggagtg                                                        |                                        |
| R15    | YL-ACBP-X-R          | tggtgtaattgtgggtgtgtgtggagatgacgacaccttgag<br>cggtgtatatggcgta                  | pCRII-TOPO/ACBP(n)                     |
| F15    | TMAL-trim-XmaI       | cccgggagagagtcaatgggagagtcga                                                    | pCRII-TOPO/TMALtrim                    |
| R16    | YTMAL-BamHI-R        | ggatccggttgagtagtggtggtgg                                                       |                                        |
| F16    | GBN-pNYL-ACBPp-F     | tgtagactggatactagtcggggaccggtcctaagtatacc                                       | pNYLACBP(n)                            |
| R17    | GBN-pNYL-ACBPp-R     | cgacgagctcgaattcggatccggtgtaattgggtgttg<br>tgag                                 |                                        |
| F17    | XmaI-UAS1-F          | cccgggttcgaaggtagcaaggaag                                                       | pCRII-TOPO/UAS1B8-TEF(136)             |
| R18    | TEF1-BglII-MfeI-XhoI | ctcgagcaattgagatcttggtgcgcgcctttgaatgattc                                       |                                        |
| F18    | H3p-260-HindIII-F    | aagcttccaacaggcaaaatgcacc                                                       |                                        |

|     |                        |                                                                        |                                                                                 |
|-----|------------------------|------------------------------------------------------------------------|---------------------------------------------------------------------------------|
| R19 | H3p-260-BglII-MfeI-R   | caattgagatctgtatttgttggagtgggtg                                        | pCRII-TOPO/H3p(260)                                                             |
| F19 | TMALp-250-HindIII-F    | aagcttctgtttgtgtccacag                                                 | pCRII-TOPO/TMALp(250)                                                           |
| R20 | TMALp-250-BglII-MfeI-R | caattgagatctggttgagtagtggtggggga                                       |                                                                                 |
| F20 | GBN-pCfB-H3-F          | acttcaacggaatgcgtgcggtgcgcgagctgtctatga                                | pYLH3 INTF_3                                                                    |
| R21 | GBN-pCfB-H3-R          | gaacagaaggaatgcacgcgatctcgaggaattcggatcctgtatttgttggagt                |                                                                                 |
| F21 | GBN-pCfB-EXP1-F        | acttcaacggaatgcgtgcgaaggagtttggcgccggtt                                | pYLEXP1 INTF_3                                                                  |
| R22 | GBN-pCfB-EXP1-R        | acagaaggaatgcacgcgatctcgaggtcgacgagctcgaaattcggatcctgctgtagatatgtctgtg |                                                                                 |
| F22 | GBN-pCfB-TMALtr-F      | acttcaacggaatgcgtgcgccgggagagagtcaatgggaga                             | pYLTMALtrim INTF_3                                                              |
| R23 | GBN-pCfB-TMALtr-R      | ccgaacagaaggaatgcacgcgatctcgagctcgagatcgacgagctcgaattc                 |                                                                                 |
| F23 | GBN-pCfB-Xma-UAS       | acttcaacggaatgcgtgcgccgggttcgaaggtagccaagg                             | pYLUAS1B8-TEF(136) INTF_3, pYLUAS1B8-H3(260) INTF_3, pYLUAS1B8-TMAL(250) INTF_3 |
| R24 | GBN-pCfB-mcs-R         | tccgaacagaaggaatgcacgcgctcgagcaattgagatct                              |                                                                                 |
| F24 | YLIP2-BamHI            | ggatccatgaagctttccaccatcctcttcacag                                     | pCII-TOPO/YLLIP2                                                                |
| R25 | YLIP2-R-XhoI           | ctcgagtttagataccacagacaccctcggtgacgaag                                 |                                                                                 |
| F25 | RT-YITEF1-a-L          | ccgttcttgattgccacactgccca                                              | RT-qPCR of TEF1                                                                 |
| R26 | RT-YITEF1-a-R          | agcaacggtctgtcgcatgtctcg                                               |                                                                                 |
| F26 | RT-YIH3-L              | cgaaggtcaccggtggaaaggct                                                | RT-qPCR of H3                                                                   |
| R27 | RT-YIH3-R              | tgggcaatctctcgacaagtcgc                                                |                                                                                 |
| F27 | RT-YIACBP-L            | agcttccaagactccttccgacga                                               | RT-qPCR of ACBP                                                                 |
| R28 | RT-YIACBP-R            | tgactcctgctcagcctcctct                                                 |                                                                                 |
| F28 | RT-YIAQP-L             | acccttgtgtcactctcgccctca                                               | RT-qPCR of AQP                                                                  |
| R29 | RT-YIAQP-R             | tgggcagtcgagaacatctcgatcca                                             |                                                                                 |
| F29 | RT-YIDIOX-L            | aggctacctccctccatctccaa                                                | RT-qPCR of DIOX                                                                 |
| R30 | RT-YIDIOX-R            | gctgctcgtcgttgatgtcctggt                                               |                                                                                 |
| F30 | RT-YALIOF00484-L       | tttcagaccggggccattctcga                                                | RT-qPCR of GK                                                                   |
| R31 | RT-YALIOF00484-R       | actcggtcatgcctcgggtgtga                                                |                                                                                 |
| F31 | RT-YALIO_C06237-L      | atgtcccacaccaagaacgcctc                                                | RT-qPCR of TMAL                                                                 |
| R32 | RT-YALIO_C06237-R      | taaagtcgggcccgtgatgttgc                                                |                                                                                 |

**Table S3. Composition of the synthetic medium.**

| Component                                                            | Working Concentration (10% v/v) | Working Concentration (7.5%v/v) |
|----------------------------------------------------------------------|---------------------------------|---------------------------------|
| Pure glycerol (ml l <sup>-1</sup> )                                  | 100                             | 75                              |
| (NH <sub>4</sub> ) <sub>2</sub> SO <sub>4</sub> (g l <sup>-1</sup> ) | 3                               | 3                               |
| CaCl <sub>2</sub> x2H <sub>2</sub> O (g l <sup>-1</sup> )            | 0,20                            | 0,20                            |
| FeCl <sub>3</sub> (g l <sup>-1</sup> )                               | 0,02                            | 0,02                            |
| Thiamin-HCl (g l <sup>-1</sup> )                                     | 0,001                           | 0,001                           |
| H <sub>3</sub> BO <sub>3</sub> (g l <sup>-1</sup> )                  | 0,0005                          | 0,0005                          |
| CuSO <sub>4</sub> x 5H <sub>2</sub> O (g l <sup>-1</sup> )           | 0,00006                         | 0,00006                         |

|                                                                           |          |          |
|---------------------------------------------------------------------------|----------|----------|
| KI (g l <sup>-1</sup> )                                                   | 0,0001   | 0,0001   |
| MnSO <sub>4</sub> x H <sub>2</sub> O (g l <sup>-1</sup> )                 | 0,00045  | 0,00045  |
| ZnSO <sub>4</sub> x 7H <sub>2</sub> O (g l <sup>-1</sup> )                | 0,000710 | 0,000710 |
| Na <sub>2</sub> MoO <sub>4</sub> x 2H <sub>2</sub> O (g l <sup>-1</sup> ) | 0,00023  | 0,00023  |
| KH <sub>2</sub> PO <sub>4</sub> (g l <sup>-1</sup> )                      | 1        | 1        |
| Na <sub>2</sub> HPO <sub>4</sub> x 2H <sub>2</sub> O (g l <sup>-1</sup> ) | 1,3      | 1,3      |
| MgSO <sub>4</sub> x7H <sub>2</sub> O (g l <sup>-1</sup> )                 | 1        | 1        |

## References

1. Schwartz, C.M.; Hussain, M.S.; Blenner, M.; Wheeldon, I. Synthetic RNA Polymerase III Promoters Facilitate High-Efficiency CRISPR-Cas9-Mediated Genome Editing in *Yarrowia lipolytica*. *ACS Synth Biol* **2016**, *5*, 356-359, doi:10.1021/acssynbio.5b00162.
2. Holkenbrink, C.; Dam, M.I.; Kildegaard, K.R.; Beder, J.; Dahlin, J.; Doménech Belda, D.; Borodina, I. EasyCloneYALI: CRISPR/Cas9-Based Synthetic Toolbox for Engineering of the Yeast *Yarrowia lipolytica*. *Biotechnology Journal* **2018**, *13*, 1700543, doi:10.1002/biot.201700543.
